# Supplementary material for: Targeting phospholipase D1 attenuates intestinal tumorigenesis by controlling β-catenin signaling in cancer-initiating cells
Source: PubMed Central journal article supplement — J Exp Med. 2015 Jul 27;212(8):1219–37. doi: 10.1084/jem.20141254 (PMC4516794; doi:10.1084/jem.20141254), 2015-07-27
Supplement: supp_jem.20141254_JEM_20141254_sm.pdf [file supp_jem.20141254_JEM_20141254_sm.pdf]

## SUPPLEMENTAL MATERIAL

Kang et al., <http://www.jem.org/cgi/content/full/jem.20141254/DC1>**Table S1.** Gene counts for all genes commonly up-regulated by shPLD1 in DLD1 and HCT116 cells (>1.25-fold change)

| RefSeq accession no. | GeneSymbol | shPLD1/shCTRL fold change |              |
|----------------------|------------|---------------------------|--------------|
|                      |            | DLD1 cells                | HCT116 cells |
| NM_001605.2          | AARS       | 1.54                      | 1.49         |
| NM_005165.2          | ALDOC      | 1.27                      | 1.57         |
| NM_000479.3          | AMH        | 1.46                      | 1.37         |
| NM_001039667.2       | ANGPTL4    | 1.36                      | 1.47         |
| NM_004723.3          | ARHGEF2    | 1.47                      | 1.49         |
| NM_133436.2          | ASNS       | 1.26                      | 1.47         |
| NM_006538.4          | BCL2L11    | 2.05                      | 1.85         |
| NM_153274.2          | BEST4      | 1.33                      | 1.28         |
| NM_001009894.2       | C12orf29   | 1.28                      | 1.42         |
| NM_018353.4          | C14orf106  | 1.26                      | 1.46         |
| NM_182597.2          | C7orf53    | 1.27                      | 1.25         |
| NM_023925.4          | CAPRIN2    | 1.30                      | 1.25         |
| NM_003655.2          | CBX4       | 1.81                      | 1.28         |
| NM_175709.2          | CBX7       | 1.36                      | 2.51         |
| NM_145697.2          | CDCA1      | 1.30                      | 1.34         |
| NM_004064.3          | CDKN1B     | 2.12                      | 2.16         |
| NM_001800.3          | CDKN2D     | 1.36                      | 2.87         |
| NM_001806.3          | CEBPG      | 1.43                      | 1.49         |
| NM_007007.2          | CPSF6      | 1.27                      | 1.40         |
| NM_020248.2          | CTNNBIP1   | 1.81                      | 1.63         |
| NM_019885.3          | CYP26B1    | 2.21                      | 2.89         |
| NM_004083.5          | DDIT3      | 1.29                      | 1.82         |
| XM_931833.2          | DDX12      | 1.45                      | 1.29         |
| NM_031471.5          | FERMT3     | 1.34                      | 1.30         |
| NM_002569.3          | FURIN      | 1.39                      | 1.37         |
| NM_003857.3          | GALR2      | 1.68                      | 1.68         |
| NM_001498.3          | GCLC       | 1.75                      | 1.32         |
| NM_005347.3          | HSPA5      | 1.41                      | 1.54         |
| NM_031207.3          | HY1        | 1.30                      | 1.29         |
| NM_004523.3          | KIF11      | 1.31                      | 1.34         |
| NM_001007075.2       | KLHL5      | 1.42                      | 1.37         |
| NM_007043.6          | KRR1       | 1.26                      | 1.45         |
| NM_022040.3          | LAT2       | 1.41                      | 1.28         |
| NM_014981.1          | MYH15      | 1.43                      | 1.38         |
| NM_173199.2          | NR4A3      | 1.86                      | 2.56         |
| NM_003873.5          | NRP1       | 1.38                      | 1.43         |
| NM_001042483.1       | NUPR1      | 1.44                      | 1.47         |
| NM_000930.3          | PLAT       | 1.50                      | 1.29         |
| NM_021127.2          | PMAIP1     | 1.89                      | 2.06         |
| NM_006252.3          | PRKAA2     | 2.32                      | 2.32         |
| NM_018663.2          | PXMP2      | 1.28                      | 1.29         |
| NM_022912.2          | REEP1      | 1.68                      | 1.38         |
| NM_144726.2          | RNF145     | 1.31                      | 1.38         |
| NM_001013251.2       | SLC3A2     | 1.33                      | 1.28         |
| NM_006939.2          | SOS2       | 1.79                      | 1.69         |
| NM_003900.4          | SQSTM1     | 1.32                      | 1.44         |

**Table S1.** Gene counts for all genes commonly up-regulated by shPLD1 in DLD1 and HCT116 cells (>1.25-fold change)  
(Continued)

| RefSeq accession no. | GeneSymbol | shPLD1/shCTRL fold change |              |
|----------------------|------------|---------------------------|--------------|
|                      |            | DLD1 cells                | HCT116 cells |
| NM_007107.3          | SSR3       | 2.11                      | 1.35         |
| NM_032431.2          | SYVN1      | 1.43                      | 1.68         |
| NM_016111.3          | TELO2      | 1.31                      | 1.32         |
| NM_017905.4          | TMCO3      | 1.26                      | 1.42         |
| NM_173633.2          | TMEM145    | 1.27                      | 1.40         |
| NM_003842.4          | TNFRSF10B  | 1.28                      | 1.80         |
| NM_022371.3          | TOR3A      | 1.68                      | 1.25         |
| NM_005427.2          | TP73       | 2.06                      | 2.00         |
| NM_003364.3          | UPP1       | 1.27                      | 1.87         |
| NM_003378.3          | VGf        | 1.41                      | 1.90         |
| BC064139             |            | 1.31                      | 1.32         |
| AL833381             |            | 1.30                      | 1.34         |
| AK124299             |            | 1.30                      | 1.34         |
| DR977977             |            | 1.25                      | 1.28         |
| NM_213647.2          | FGFR4      | 1.44                      | 1.38         |
| NM_000872.4          | HTR7       | 1.37                      | 1.41         |
| NM_000028.2          | AGL        | 1.36                      | 1.31         |
| NR_022014.1          | C15orf21   | 1.28                      | 1.28         |
| NM_024511.5          | C4orf15    | 1.33                      | 1.29         |
| NM_017423.2          | GALNT7     | 1.37                      | 1.33         |
| NM_004491.4          | GRLF1      | 1.34                      | 1.26         |
| NM_015275.2          | KIAA1033   | 1.26                      | 1.31         |
| NM_001080429.2       | KIAA1543   | 1.31                      | 1.26         |
| NM_003023.4          | SH3BP2     | 1.26                      | 1.26         |
| NR_003199.1          | SNORD114-7 | 1.31                      | 1.28         |
| NM_139171.1          | STARD6     | 1.28                      | 1.38         |

**Table S2.** Gene counts for all genes commonly down-regulated by shPLD1 in DLD1 and HCT116 cells (less than  $-1.25$ -fold change)

| RefSeq accession no. | GeneSymbol | shPLD1/shCTRL fold change |              |
|----------------------|------------|---------------------------|--------------|
|                      |            | DLD1 cells                | HCT116 cells |
| NM_001627.3          | ALCAM      | -1.81                     | -1.89        |
| NM_030660.3          | ATXN3      | -1.27                     | -1.28        |
| NM_004217.3          | AURKB      | -2.02                     | -1.94        |
| NM_001195.3          | BFSP1      | -1.27                     | -1.76        |
| NM_130851.2          | BMP4       | -1.90                     | -2.98        |
| NM_004053.3          | BYSL       | -2.01                     | -1.98        |
| NM_023938.5          | C1orf116   | -1.28                     | -1.27        |
| NM_173518.4          | C8orf45    | -1.31                     | -1.28        |
| NM_053056.2          | CCND1      | -1.79                     | -2.57        |
| NM_001760.3          | CCND3      | -2.06                     | -2.15        |
| NM_013230.3          | CD24       | -1.76                     | -3.72        |
| NM_016579.3          | CD320      | -1.81                     | -1.96        |
| NM_001001391.1       | CD44       | -2.02                     | -2.11        |
| NM_001789.2          | CDC25A     | -2.08                     | -2.15        |
| NM_005192.3          | CDKN3      | -1.92                     | -1.91        |
| NM_001024912.2       | CEACAM1    | -1.44                     | -1.43        |
| NM_152353.2          | CLDND2     | -2.02                     | -1.69        |
| NM_001901.2          | CTGF       | -2.06                     | -2.39        |
| NM_001098209.1       | CTNNB1     | -2.14                     | -1.79        |
| NM_016229.4          | CYB5R2     | -1.50                     | -1.29        |
| NM_032687.3          | CYHR1      | -1.30                     | -1.29        |
| NM_004728.3          | DDX21      | -2.22                     | -1.75        |
| NM_001037499         | DEFB114    | -1.26                     | -1.26        |
| NM_021004.3          | DHRS4      | -1.46                     | -1.27        |
| NM_004675.2          | DIRAS3     | -1.44                     | -1.28        |
| NM_001363.3          | DKC1       | -1.96                     | -2.03        |
| NM_004006.2          | DMD        | -1.30                     | -1.47        |
| NM_004417.3          | DUSP1      | -1.65                     | -1.63        |
| NM_003633.2          | ENC1       | -1.84                     | -2.11        |
| NM_002354.2          | EPCAM      | -1.87                     | -2.05        |
| NR_024241.1          | FAM86D     | -1.31                     | -1.27        |
| NM_004114.3          | FGF13      | -1.38                     | -1.26        |
| XM_028217.5          | FLJ20021   | -1.38                     | -1.52        |
| NR_003661.2          | FLJ43276   | -1.37                     | -1.26        |
| NM_005252.3          | FOS        | -2.24                     | -2.24        |
| NM_006732.2          | FOSB       | -1.65                     | -1.54        |
| NM_033260.3          | FOXQ1      | -1.97                     | -1.92        |
| NM_198334.2          | GANAB      | -1.31                     | -1.25        |
| NM_138737.2          | HEPH       | -1.26                     | -1.48        |
| NM_138571.4          | HINT3      | -1.43                     | -1.78        |
| NM_004838.3          | HOMER3     | -1.26                     | -1.26        |
| NM_181353.2          | ID1        | -1.35                     | -1.36        |
| NM_002166.4          | ID2        | -1.93                     | -3.32        |
| NM_002167.3          | ID3        | -1.71                     | -2.08        |
| NM_198267.1          | ING3       | -1.33                     | -1.27        |
| NM_000214.2          | JAG1       | -2.11                     | -1.87        |
| NM_002276.4          | KRT19      | -1.27                     | -1.26        |

**Table S2.** Gene counts for all genes commonly down-regulated by shPLD1 in DLD1 and HCT116 cells (less than  $-1.25$ -fold change) (*Continued*)

| RefSeq accession no. | GeneSymbol | shPLD1/shCTRL fold change |              |
|----------------------|------------|---------------------------|--------------|
|                      |            | DLD1 cells                | HCT116 cells |
| NM_016269.3          | LEF1       | -2.38                     | -2.07        |
| NM_003667.3          | LGR5       | -1.92                     | -1.99        |
| NM_005572.3          | LMNA       | -1.27                     | -1.32        |
| XM_938779.2          | LOC653972  | -1.40                     | -1.26        |
| NM_004811.2          | LPXN       | -1.36                     | -1.41        |
| NM_024641.3          | MANEA      | -1.26                     | -1.29        |
| NM_181509.2          | MAP1LC3A   | -1.36                     | -1.33        |
| NM_000245.2          | MET        | -2.31                     | -2.03        |
| NM_001004307.2       | MGC33556   | -1.33                     | -1.25        |
| NM_153361.3          | MGC42105   | -1.44                     | -1.26        |
| NM_002442.3          | MSI1       | -1.77                     | -1.90        |
| NM_175617.3          | MT1E       | -1.32                     | -1.90        |
| NM_002467.4          | MYC        | -1.98                     | -1.83        |
| NM_032993.2          | NOLA1      | -2.16                     | -1.80        |
| NM_005654.5          | NR2F1      | -1.38                     | -1.28        |
| NM_006186.3          | NR4A2      | -1.34                     | -1.30        |
| NM_022731.3          | NUCKS1     | -1.66                     | -1.81        |
| NM_013248.2          | NXT1       | -1.64                     | -1.94        |
| NM_001032409.1       | OAS1       | -1.26                     | -1.27        |
| NM_000281.3          | PCBD1      | -1.28                     | -1.26        |
| NM_003735.2          | PCDHGA12   | -1.28                     | -1.27        |
| NM_017837.3          | PIGV       | -1.60                     | -1.46        |
| NM_005084.3          | PLA2G7     | -1.33                     | -1.40        |
| NM_002662.3          | PLD1       | -7.16                     | -4.08        |
| NM_006017.2          | PROM1      | -1.94                     | -1.77        |
| NM_004676.2          | PRY        | -1.27                     | -1.34        |
| NM_002801.3          | PSMB10     | -1.34                     | -1.32        |
| NM_000321.2          | RB1        | -2.26                     | -3.28        |
| NM_002997.4          | SDC1       | -1.26                     | -1.52        |
| NM_015685.4          | SDCBP2     | -1.32                     | -1.53        |
| NR_003264.2          | SDHALP1    | -1.34                     | -1.28        |
| NR_003142.2          | SNHG9      | -1.34                     | -1.33        |
| NM_003107.2          | SOX4       | -2.09                     | -2.07        |
| NM_018327.2          | SPTLC3     | -1.43                     | -1.26        |
| NM_003146.2          | SSRP1      | -1.43                     | -1.42        |
| NM_206928.2          | SYTL2      | -1.31                     | -1.48        |
| NM_005645.3          | TAF13      | -1.33                     | -1.45        |
| NM_201443.2          | TEAD4      | -1.95                     | -2.57        |
| NM_033502.2          | TRERF1     | -1.40                     | -1.38        |
| NM_017722.3          | TRMT1      | -1.91                     | -2.00        |
| NM_005723.3          | TSPAN5     | -1.28                     | -1.33        |
| NM_054035.2          | UNC119     | -1.44                     | -1.31        |
| NM_199245.2          | VAMP1      | -1.29                     | -1.53        |
| NM_020411.2          | XAGE1D     | -1.26                     | -1.25        |
| NM_144684.2          | ZNF480     | -1.28                     | -1.33        |
| NM_145806.3          | ZNF511     | -1.71                     | -1.99        |
| NM_015871.4          | ZNF593     | -2.29                     | -1.59        |

**Table S2.** Gene counts for all genes commonly down-regulated by shPLD1 in DLD1 and HCT116 cells (less than  $-1.25$ -fold change) (*Continued*)

| RefSeq accession no. | GeneSymbol | shPLD1/shCTRL fold change |              |
|----------------------|------------|---------------------------|--------------|
|                      |            | DLD1 cells                | HCT116 cells |
| BE276063             |            | -1.43                     | -1.30        |
| AK091904             |            | -1.27                     | -1.29        |
| BU564425             |            | -1.27                     | -1.28        |
| BM702416             |            | -1.53                     | -1.50        |

**Table S3.** The listed primer sets were used in promoter cloning of indicated genes

| Promoter         | Direction | Sequence                                        |
|------------------|-----------|-------------------------------------------------|
| CD133            | Forward   | 5'-AAAGGTACCCCCTTACCCTAGCCATCTGCGCCGC-3'        |
|                  | Reverse   | 5'-CGCTCGAGCAAGAAGTACGATCGTGCACTTGCTTTCTTAAC-3' |
| CD44             | Forward   | 5'-AAAGGTACCCTTCCCTCAGAAGTCCTGGCATGG-3'         |
|                  | Reverse   | 5'-CCGCTCGAGTCAGGACAGAGGATGACCGA-3'             |
| CD166            | Forward   | 5'-CCTGAGCTCACCCCTGGCTTTACCATTGCT-3'            |
|                  | Reverse   | 5'-CCGCTCGAGCGCCAATAAGAAGCAAGCAC-3'             |
| EpCAM            | Forward   | 5'-AAAGTACCACGCCCGGCTAATTTTGTAT-3'              |
|                  | Reverse   | 5'-CCGCTCGAGGGGAGTTGGGGGAGTGAGTA-3'             |
| $\beta$ -catenin | Forward   | 5'-TTTGGTACCGTCTGAAGTGTGAAATAATCTTGCTTT-3'      |
|                  | Reverse   | 5'-TTTAAGCTTCCAACGCTGCTGCCACAGACCGAGAGG-3'      |
| miR-4496         | Forward   | 5'-AAAGTACCCCACCCCGGCTAATTTTGTATTTATAG-3'       |
|                  | Reverse   | 5'-TTTAAGCTTCTGATGTATGCAAAGCACCTACCAC-3'        |

**Table S4.** The listed primer sets were used in q-PCR for measuring gene expression relative to  $\beta$ -actin or 18S

| Human gene                        | Forward                       | Reverse                        |
|-----------------------------------|-------------------------------|--------------------------------|
| <i>PLD1</i>                       | 5'-AATCGTTGGAGGTTGGACTG-3'    | 5'-AGCATTTTCGAGCTGCTGTTGAA-3'  |
| <i>RB1</i>                        | 5'-TTGGGAGAAAGTTTCATCTGTGG-3' | 5'-CGACATCTCATCTAGGTCAACTGC-3' |
| <i>CTNNB1</i>                     | 5'-GGTTGCCTTGCTCAACAAAA-3'    | 5'-TCCCAAGGAGACCTTCCATC-3'     |
| <i>E2F1</i>                       | 5'-GTGTCGTCGACCTGAACTGG-3'    | 5'-CT1p7TCTTGGCAATGAGCTGGA-3'  |
| <i>c-Myc</i>                      | 5'-CGAGGAGGAGAACTTCTACCAGC-3' | 5'-CGAGAAGCCGCTCCACATACAGTC-3' |
| <i>CCND1</i>                      | 5'-TGCTCCTGGTGAACAAGCTC-3'    | 5'-AGGACAGGAAGTTGTTGGGG-3'     |
| <i>PROM1</i>                      | 5'-CAAAGAGGCGTTGGAGAAC-3'     | 5'-GCAGGCTAGTTTTTCACGCTG-3'    |
| <i>CD44</i>                       | 5'-TCCAACACCTCCCAGTATGACA-3'  | 5'-GGCAGGTCTGTGACTGATGTACA-3'  |
| <i>ALCAM</i>                      | 5'-AGATTGGTGATGCCCTACCC-3'    | 5'-GACGCTTCCACTGCCAGTAA-3'     |
| <i>EpCAM</i>                      | 5'-GGCCGTAAACTGCTTTGTGA-3'    | 5'-TTGAGCCATTCATTTCTGCC-3'     |
| <i>CD24</i>                       | 5'-TTCCTCCTGAGGCTTTGGATT-3'   | 5'-GAGGCTGAGGCAGGAGAATC-3'     |
| <i>18S</i>                        | 5'-CGTCTGCCCTATCAACTTTCG-3'   | 5'-TTCCTTGGATGTGGTAGCCG-3'     |
| <b>Mouse gene</b>                 |                               |                                |
| <i>PLD1</i>                       | 5'-GACACAGAGACGGTCCCATC-3'    | 5'-CATTGGGAAGGCACCCGAAG-3'     |
| <i>RB1</i>                        | 5'-GAGCTACAGAAAAGCATAGAAAC-3' | 5'-ACACGTCCGTTCTAATTTGCTG-3'   |
| <i><math>\beta</math>-catenin</i> | 5'-GAGTAGCTGCAGGGTCTC-3'      | 5'-GGACAGCAGCTGCGTATGTT-3'     |
| <i>E2F1</i>                       | 5'-AAGGCCCATTTGATGTTTTTC-3'   | 5'-ATGTGGAGGGAGGTGATGGT-3'     |
| <i>c-Myc</i>                      | 5'-AAGCAGATCAGCAACAACCG-3'    | 5'-GCCTCTTGTGTTTTCTCC-3'       |
| <i>cyclin D1</i>                  | 5'-GCAAGCATGCACAGACCTTT-3'    | 5'-GCTTCAATCTGTTCTGGCA-3'      |
| <i>CD133</i>                      | 5'-GGATCAAAGGGACCCAGAAA-3'    | 5'-GGTCTGTTTGTGCGTGTGCG-3'     |
| <i>CD44</i>                       | 5'-TACCCACCATGGACCAATG-3'     | 5'-GTTGGCTGCACAGATAGCGT-3'     |
| <i>CD166</i>                      | 5'-ATGCCATCAAAGAAGGGGACAA-3'  | 5'-GACTGGAAAAGGAAGGGCTG-3'     |
| <i>EpCAM</i>                      | 5'-GGCGATGAAAGCAGAAATGA-3'    | 5'-AGTGGTCGTAGGGGCTTTCTCT-3'   |
| <i>CD24</i>                       | 5'-GACCGTGAAAGGTTTTGAGA-3'    | 5'-TCCAGCAGATTCAATAGCCG-3'     |
| <i><math>\beta</math>-actin</i>   | 5'-AAGGAAGGCTGAAAAGAGC-3'     | 5'-GCTACAGCTTCACCACCACA-3'     |

**Table S5.** Sequences of the promoter-specific primers used in ChIP assay

| IP/anti-E2F1                              | Forward                       | Reverse                    |
|-------------------------------------------|-------------------------------|----------------------------|
| miR-4496                                  | 5'-GTTTTAAATGAAAACCAGAGACC-3' | 5'-CTGATGTATGCAAAGCACCT-3' |
| <b>IP/anti-<math>\beta</math>-catenin</b> |                               |                            |
| CD133                                     | 5'-GGTGAGTGTGCGAACTGGAC-3'    | 5'-TCTTGCCAGAGAGAAGGGGT-3' |
| CD44                                      | 5'-GAAGTCCTGGCATGGTTCCT-3'    | 5'-GGGGAAGCCTTTTGAGATTG-3' |
| CD166                                     | 5'-ACCCTGGCTTTACCATTGCT-3'    | 5'-GGGACGAAGGCAACAATACA-3' |
| EpCAM                                     | 5'-CAGGCTGGTCTCGAACTTCA-3'    | 5'-CACAGGCAGAGAACCTTCCA-3' |
